# Supplementary material for: Human neutralizing antibodies elicited by SARS-CoV-2 infection
Source: Springer Nature journal article supplement (doi:10.1038/s41586-020-2380-z), 2020-05-26
Supplement: 41586_2020_2380_MOESM2_ESM.pdf [file 41586_2020_2380_MOESM2_ESM.pdf]

## Reporting Summary

Nature Research wishes to improve the reproducibility of the work that we publish. This form provides structure for consistency and transparency in reporting. For further information on Nature Research policies, see [Authors & Referees](#) and the [Editorial Policy Checklist](#).

### Statistics

For all statistical analyses, confirm that the following items are present in the figure legend, table legend, main text, or Methods section.

n/a Confirmed

- |                                     |                                     |                                                                                                                                                                                                                                                            |
|-------------------------------------|-------------------------------------|------------------------------------------------------------------------------------------------------------------------------------------------------------------------------------------------------------------------------------------------------------|
| <input type="checkbox"/>            | <input checked="" type="checkbox"/> | The exact sample size ( $n$ ) for each experimental group/condition, given as a discrete number and unit of measurement                                                                                                                                    |
| <input type="checkbox"/>            | <input checked="" type="checkbox"/> | A statement on whether measurements were taken from distinct samples or whether the same sample was measured repeatedly                                                                                                                                    |
| <input checked="" type="checkbox"/> | <input type="checkbox"/>            | The statistical test(s) used AND whether they are one- or two-sided<br><i>Only common tests should be described solely by name; describe more complex techniques in the Methods section.</i>                                                               |
| <input checked="" type="checkbox"/> | <input type="checkbox"/>            | A description of all covariates tested                                                                                                                                                                                                                     |
| <input checked="" type="checkbox"/> | <input type="checkbox"/>            | A description of any assumptions or corrections, such as tests of normality and adjustment for multiple comparisons                                                                                                                                        |
| <input checked="" type="checkbox"/> | <input type="checkbox"/>            | A full description of the statistical parameters including central tendency (e.g. means) or other basic estimates (e.g. regression coefficient) AND variation (e.g. standard deviation) or associated estimates of uncertainty (e.g. confidence intervals) |
| <input checked="" type="checkbox"/> | <input type="checkbox"/>            | For null hypothesis testing, the test statistic (e.g. $F$ , $t$ , $r$ ) with confidence intervals, effect sizes, degrees of freedom and $P$ value noted<br><i>Give <math>P</math> values as exact values whenever suitable.</i>                            |
| <input checked="" type="checkbox"/> | <input type="checkbox"/>            | For Bayesian analysis, information on the choice of priors and Markov chain Monte Carlo settings                                                                                                                                                           |
| <input checked="" type="checkbox"/> | <input type="checkbox"/>            | For hierarchical and complex designs, identification of the appropriate level for tests and full reporting of outcomes                                                                                                                                     |
| <input checked="" type="checkbox"/> | <input type="checkbox"/>            | Estimates of effect sizes (e.g. Cohen's $d$ , Pearson's $r$ ), indicating how they were calculated                                                                                                                                                         |

*Our web collection on [statistics for biologists](#) contains articles on many of the points above.*

### Software and code

Policy information about [availability of computer code](#)

|                 |                                                                                                                                                                                                                                                                                                                                                                                                                                                                                                                                                                                                  |
|-----------------|--------------------------------------------------------------------------------------------------------------------------------------------------------------------------------------------------------------------------------------------------------------------------------------------------------------------------------------------------------------------------------------------------------------------------------------------------------------------------------------------------------------------------------------------------------------------------------------------------|
| Data collection | Flow cytometry BD Aria II was used for cell sorting and Biacore T200 Control Software was used for binding kinetic studies.                                                                                                                                                                                                                                                                                                                                                                                                                                                                      |
| Data analysis   | The program IMG2/V-QUEST ( <a href="http://www.imgt.org/IMG2_vquest/vquest">http://www.imgt.org/IMG2_vquest/vquest</a> ) was applied to analyze gene germline, complementarity determining region (CDR) 3 length, and somatic hypermutation (SHM). The CDR3 length was calculated from amino acids sequences. The SHM frequency was calculated from the mutated nucleotides. Graphs were presented by GraphPad Prism version 7, R version 3.6.2, MEGA version X, and Biacore T200 Evaluation version 3.1 softwares. Flow cytometry data analysis was performed using FlowJo version 10 software. |

For manuscripts utilizing custom algorithms or software that are central to the research but not yet described in published literature, software must be made available to editors/reviewers. We strongly encourage code deposition in a community repository (e.g. GitHub). See the Nature Research [guidelines for submitting code & software](#) for further information.

### Data

Policy information about [availability of data](#)

All manuscripts must include a [data availability statement](#). This statement should provide the following information, where applicable:

- Accession codes, unique identifiers, or web links for publicly available datasets
- A list of figures that have associated raw data
- A description of any restrictions on data availability

Crystal structure presented in this work has been deposited in the Protein Data Bank (PDB) and are available with accession codes 7BWJ. Other data generated or analyzed during this study are included in this published article (and its supplementary information files). Any other raw data pertaining to this study are available from the corresponding authors upon reasonable request.

## Field-specific reporting

Please select the one below that is the best fit for your research. If you are not sure, read the appropriate sections before making your selection.

- Life sciences  Behavioural & social sciences  Ecological, evolutionary & environmental sciences

For a reference copy of the document with all sections, see [nature.com/documents/nr-reporting-summary-flat.pdf](https://www.nature.com/documents/nr-reporting-summary-flat.pdf)

## Life sciences study design

All studies must disclose on these points even when the disclosure is negative.

|                 |                                                                                                                                                                                                                                   |
|-----------------|-----------------------------------------------------------------------------------------------------------------------------------------------------------------------------------------------------------------------------------|
| Sample size     | We have isolated antibodies from PBMCs of eight SARS-CoV-2-infected donors, including 3 severe patients and 5 mild patients, aging from 10 to 66 years old. This sample size is sufficient for isolating neutralizing antibodies. |
| Data exclusions | No data were excluded.                                                                                                                                                                                                            |
| Replication     | ELISA analysis, neutralization assay, epitope mapping experiments, mabs binding to cell surface expressed spike proteins, the crystal of complex were performed in duplicate. All attempts at replication were successful.        |
| Randomization   | Not applicable for this study as no treatment strategies are compared.                                                                                                                                                            |
| Blinding        | No blinding was conducted since there was no specific grouping.                                                                                                                                                                   |

## Reporting for specific materials, systems and methods

We require information from authors about some types of materials, experimental systems and methods used in many studies. Here, indicate whether each material, system or method listed is relevant to your study. If you are not sure if a list item applies to your research, read the appropriate section before selecting a response.

### Materials & experimental systems

| n/a                                 | Involved in the study                                           |
|-------------------------------------|-----------------------------------------------------------------|
| <input type="checkbox"/>            | <input checked="" type="checkbox"/> Antibodies                  |
| <input type="checkbox"/>            | <input checked="" type="checkbox"/> Eukaryotic cell lines       |
| <input checked="" type="checkbox"/> | <input type="checkbox"/> Palaeontology                          |
| <input checked="" type="checkbox"/> | <input type="checkbox"/> Animals and other organisms            |
| <input type="checkbox"/>            | <input checked="" type="checkbox"/> Human research participants |
| <input checked="" type="checkbox"/> | <input type="checkbox"/> Clinical data                          |

### Methods

| n/a                                 | Involved in the study                              |
|-------------------------------------|----------------------------------------------------|
| <input checked="" type="checkbox"/> | <input type="checkbox"/> ChIP-seq                  |
| <input type="checkbox"/>            | <input checked="" type="checkbox"/> Flow cytometry |
| <input checked="" type="checkbox"/> | <input type="checkbox"/> MRI-based neuroimaging    |

## Antibodies

### Antibodies used

For identification of human specific memory B cells for production of monoclonal antibodies, CD19-PE-Cy7 (PE-Cy<sup>™</sup>7 Mouse Anti-Human CD19, BD Pharmingen, cat. 557835, clone SJ25C1, lot. 8194923, 1:50 dilution), CD3-Pacific Blue (Pacific Blue<sup>™</sup> Mouse Anti-Human CD3, BD Pharmingen, cat. 558117, clone UCHT1, lot. 8183535, 1:50 dilution), CD8-Pacific Blue (Pacific Blue<sup>™</sup> Mouse Anti-Human CD8, BD Pharmingen, cat. 558207, clone RPA-T8, lot.8127596, 1:25 dilution), CD14-Pacific Blue (Pacific Blue<sup>™</sup> Mouse Anti-Human CD14, BD Pharmingen, cat. 558121, clone M5E2, lot. 7164513, 1:50 dilution), CD27-APC-H7 (APC-H7 Mouse Anti-Human CD27, BD Pharmingen, cat. 560222, clone M-T271, lot. 8256900, 1:25 dilution), IgG-FITC (FITC Mouse Anti-Human IgG, BD Pharmingen, cat. 555786, clone G18-145, lot. 8284569, 1:12.5 dilution), anti-his-APC (Anti-6X His tag<sup>®</sup> antibody SureLight<sup>®</sup> Allophycocyanin, Abcam, cat. ab72579, clone AD1.1.10, lot. GR3192034-1, 1:25 dilution) and anti-his-PE (Anti-6X His tag<sup>®</sup> antibody Phycoerythrin, Abcam, cat. ab72467, clone AD1.1.10, lot. GR3223742-7, 1:25 dilution) antibodies were used. For characterization of human antibodies, secondary anti-human IgG-HRP (HRP goat anti-human IgG (H+L), ZSGB-BIO, cat. ZB-2304, polyclonal, lot. 118693, 1:5000 dilution) and anti-human Fc-PE (PE anti-human IgG Fc, Biolegend, cat. 410708, clone M1310G05, lot. B305154, 1:20 dilution) antibodies were used.

### Validation

All the antibodies used in this study were commercial antibodies and were only used for applications, with validation procedures described on the following sites of the manufacturers:

CD19-PE-Cy7 (PE-Cy<sup>™</sup>7 Mouse Anti-Human CD19, BD Pharmingen, cat. 557835, clone SJ25C1, lot. 8194923, 1:50 dilution)  
<https://wwwbdbiosciences.com/cn/applications/research/clinical-research/oncology-research/blood-cell-disorders/surface-markers/human/pe-cy7-mouse-anti-human-cd19-sj25c1-also-known-as-sj25-c1/p/557835>  
 CD3-Pacific Blue (Pacific Blue<sup>™</sup> Mouse Anti-Human CD3, BD Pharmingen, cat. 558117, clone UCHT1, lot. 8183535, 1:50 dilution)  
<https://wwwbdbiosciences.com/cn/applications/research/t-cell-immunology/th-1-cells/surface-markers/human/pacific-blue-mouse-anti-human-cd3-ucht1-also-known-as-ucht-1-ucht-1/p/558117>  
 CD8-Pacific Blue (Pacific Blue<sup>™</sup> Mouse Anti-Human CD8, BD Pharmingen, cat. 558207, clone RPA-T8, lot.8127596, 1:25 dilution)  
<https://wwwbdbiosciences.com/cn/reagents/research/antibodies-buffers/immunology-reagents/anti-human-antibodies/cell->

surface-antigens/pacific-blue-mouse-anti-human-cd8-rpa-t8/p/558207  
 CD14-Pacific Blue (Pacific Blue™ Mouse Anti-Human CD14, BD Pharmingen, cat. 558121, clone M5E2, lot. 7164513, 1:50 dilution)  
<https://www.bdbiosciences.com/cn/applications/research/stem-cell-research/hematopoietic-stem-cell-markers/human/negative-markers/pacific-blue-mouse-anti-human-cd14-m5e2/p/558121>  
 CD27-APC-H7 (APC-H7 Mouse Anti-Human CD27, BD Pharmingen, cat. 560222, clone M-T271, lot. 8256900, 1:25 dilution)  
<https://www.bdbiosciences.com/cn/applications/research/clinical-research/oncology-research/blood-cell-disorders/surface-markers/human/apc-h7-mouse-anti-human-cd27-m-t271/p/560222>  
 IgG-FITC (FITC Mouse Anti-Human IgG, BD Pharmingen, cat. 555786, clone G18-145, lot. 8284569, 1:12.5 dilution)  
<https://www.bdbiosciences.com/cn/applications/research/b-cell-research/immunoglobulins/human/fitc-mouse-anti-human-igg-g18-145/p/555786>  
 anti-his-APC (Anti-6X His tag® antibody SureLight® Allophycocyanin, Abcam, cat. ab72579, clone AD1.1.10, lot. GR3192034-1, 1:25 dilution)  
<https://www.abcam.com/6x-his-tag-antibody-ad1110-surelight-allophycocyanin-ab72579.html>  
 anti-his-PE (Anti-6X His tag® antibody Phycoerythrin, Abcam, cat. ab72467, clone AD1.1.10, lot. GR3223742-7, 1:25 dilution)  
<https://www.abcam.com/6x-his-tag-antibody-ad1110-phycoerythrin-ab72467.html>  
 secondary anti-human IgG-HRP (HRP goat anti-human IgG (H+L) , ZSGB-BIO, cat. ZB-2304, polyclonal, lot. 118693, 1:5000 dilution)  
<http://www.zsbio.com/product/zb-2304>  
 anti-human Fc-PE (PE anti-human IgG Fc, Biolegend, cat. 410708, clone M1310G05, lot. B305154, 1:20 dilution)  
<https://www.labome.com/product/BioLegend/410708.html>

## Eukaryotic cell lines

Policy information about [cell lines](#)

|                                                                   |                                                                                                                                                    |
|-------------------------------------------------------------------|----------------------------------------------------------------------------------------------------------------------------------------------------|
| Cell line source(s)                                               | The 293T cells, Sf9 cells, Hi5 cells, ghost cells and Huh7 cells were obtained from ATCC. The 293F cells were purchased from ThermoFisher.         |
| Authentication                                                    | All cell lines were frequently checked for cellular morphologies, growth rates and functions. All cell lines were available in commercial company. |
| Mycoplasma contamination                                          | We confirm that all cell lines were negative for mycoplasma contamination.                                                                         |
| Commonly misidentified lines (See <a href="#">ICLAC</a> register) | No commonly misidentified cell lines were used.                                                                                                    |

## Human research participants

Policy information about [studies involving human research participants](#)

|                            |                                                                                                                                                                                                                                                                                                                                                       |
|----------------------------|-------------------------------------------------------------------------------------------------------------------------------------------------------------------------------------------------------------------------------------------------------------------------------------------------------------------------------------------------------|
| Population characteristics | The study enrolled a total of eight patients aged 10 to 66 years old infected with SARS-CoV-2 in January 2020.                                                                                                                                                                                                                                        |
| Recruitment                | Study participants were recruited on the random basis from COVID-19 confirmed cases, including 3 severe patients and 5 mild patients. There was no potential self-selection bias or other biases during the selection.                                                                                                                                |
| Ethics oversight           | This study received approval from the Research Ethics Committee of Shenzhen Third People's Hospital, China (approval number: 2020-084). The Research Ethics Committee waived the requirement informed consent before the study started because of the urgent need to collect epidemiological and clinical data. We analyzed all the data anonymously. |

Note that full information on the approval of the study protocol must also be provided in the manuscript.

## Flow Cytometry

### Plots

Confirm that:

- The axis labels state the marker and fluorochrome used (e.g. CD4-FITC).
- The axis scales are clearly visible. Include numbers along axes only for bottom left plot of group (a 'group' is an analysis of identical markers).
- All plots are contour plots with outliers or pseudocolor plots.
- A numerical value for number of cells or percentage (with statistics) is provided.

### Methodology

|                    |                                                                                                                                                                                                                                                                                                                                                                                                                                                                                                                     |
|--------------------|---------------------------------------------------------------------------------------------------------------------------------------------------------------------------------------------------------------------------------------------------------------------------------------------------------------------------------------------------------------------------------------------------------------------------------------------------------------------------------------------------------------------|
| Sample preparation | PBMCs from infected individuals were collected and incubated with an antibody and RBD cocktail for identification of RBDspecific B cells. The cocktail consisted of CD19-PE-Cy7, CD3-Pacific Blue, CD8-Pacific Blue, CD14-Pacific Blue, CD27-APC-H7, IgGFITC (BD Biosciences) and the recombinant RBD-Strep or RBD-His. Three consecutive staining steps were conducted. The first was a LIVE/DEAD Fixable Dead Cell Stain Kit (Invitrogen) in 50µl phosphate-buffered saline (PBS) applied at RT for 20 minutes to |
|--------------------|---------------------------------------------------------------------------------------------------------------------------------------------------------------------------------------------------------------------------------------------------------------------------------------------------------------------------------------------------------------------------------------------------------------------------------------------------------------------------------------------------------------------|

exclude dead cells. The second utilized an antibody and RBD cocktail for an additional 30min at 4 °C. The third staining at 4 °C for 30min involved either: Streptavidin-APC (eBioscience) and/or Streptavidin-PE (BD Biosciences) to target the Strep tag of RBD, or anti-his-APC and anti-his-PE antibodies (Abcam) to target the His tag of RBD. The stained cells were washed and resuspended in PBS before being strained through a 70µm cell mesh (BD Biosciences). More information available on Methods sections.

Instrument

BD Aria II

Software

FlowJo version 10

Cell population abundance

The RBD-specific B cells constitute about 0.092%-1.86% among the CD27+ IgG+ B cell population. More Information available on Figure 2a and Extended Data Figure 2.

Gating strategy

RBD-specific B cells were gated as CD19+CD3-CD8-CD14-IgG+RBD+. More Information available on Figure 2a, Extended Data Figure 2, and Methods sections.

Tick this box to confirm that a figure exemplifying the gating strategy is provided in the Supplementary Information.
