# Supplementary material for: Human neutralizing antibodies elicited by SARS-CoV-2 infection
Source: Springer Nature journal article supplement (doi:10.1038/s41586-020-2380-z), 2020-05-26
Supplement: 41586_2020_2380_MOESM3_ESM.pdf [file 41586_2020_2380_MOESM3_ESM.pdf]

**Peer Review File**

**Manuscript Title:** Human neutralizing antibodies elicited by SARS-CoV-2 infection

**Reviewer Comments & Author Rebuttals****Reviewer Reports on the Initial Version:**

Referee #1 (Remarks to the Author):

Ju et al report a study of plasma and antibodies from 8 individuals that were infected with SARS-CoV-2. They should be commended for their ability to report their findings rapidly. Unfortunately, however the study is not particularly enlightening and it is sloppy. Moreover, the antibody yield is very poor. Only 1 of the antibodies they tested neutralizes pseudovirus with IC50 of 0.1 micrograms. So we learn little at all about the antibody response to this virus and the antibody they cloned is not likely to be clinically useful because it is not sufficiently potent.

Among the many issues, are no negative control staining. Un-impressive Neut activity on the sera from selected individuals including little if any significant cross-neutralization.

Hard to imagine how expanded clones of IgG expressing cells are not mutated. Was there a problem in the sorting.

No structural information to explain how and where the antibodies actually bind. For example, the competition experiments do not show that the antibodies are binding to the receptor binding site, just close to it. And only 2 antibodies really inhibited ACE2 binding to the trimer.

Figure 4B shows pseudo virus data and what we need to see is real IC50 curves for live virus since the 2 are often quite different and only the latter is important. Figure 4C is impossible to interpret.

Referee #2 (Remarks to the Author):

In this manuscript Ju and colleagues report 206 RBD specific mAbs from COVID19 survivors. The data provides an insight into the polyclonal and monoclonal immune response to the SARS-CoV-2 spike and the resulting mAbs might be used as therapeutics. The paper is interesting, of high quality and should be published swiftly. However, there are several points that need the authors' attention.

Major points

- 1) The font size in Figure 2B and 3A are too small to be readable.
- 2) The left and the right pictures of Figure 4C are the same. Duplication?
- 3) The microneutralization titers should be added to Table 1.

Minor points

- 1) Throughout the manuscript: 'spike', not 'Spike'
- 2) Throughout the manuscript: Many abbreviations are not defined.
- 3) Throughout the manuscript: It would be better to call SARS-CoV 'SARS-CoV-1' since this differentiates better between the old and the new SARS viruses.
- 4) Line 161: What does 'differentially presented' mean?
- 5) Line 265: Should be 'that cytopathic effect as assay readout'
- 6) Line 308: 'interventions'
- 7) Line 353: 'transmitted the infection'
- 8) Line 364: Which antiviral was used?
- 9) Line 380: 'hexahistidine tag'
- 10) Line 385: should be 'High Five'
- 11) Line 408: The strep tagged construct is nowhere described.
- 12) Line 445-446: Please rephrase.
- 13) Line 454: 'HEPE'?
- 14) Line 468: The cells were not digested, they were removed from the plate using trypsin.
- 15) Line 471: 'each of the following'
- 16) Line 531: 'binding or neutralizing'

**Author Rebuttals to Initial Comments:**

Referee #1 (Remarks to the Author):

Ju et al report a study of plasma and antibodies from 8 individuals that were infected with SARS-CoV-2. They should be commended for their ability to report their findings rapidly. Unfortunately, however the study is not particularly enlightening and it is

sloppy. Moreover, the antibody yield is very poor. Only 1 of the antibodies they tested neutralizes pseudovirus with IC<sub>50</sub> of 0.1 micrograms. So we learn little at all about the antibody response to this virus and the antibody they cloned is not likely to be clinically useful because it is not sufficiently potent.

**Response:** Unfortunately, we could not agree with the overall assessment of our manuscript by this reviewer. The isolated 206 human monoclonal antibodies and their reactivity to SARS-CoV-2 and cross-reactivity to SARS-CoV and MERS-CoV represent the first and the most advanced understanding of the antibody response in COVID-19 patients. Among the first 18 mAbs thoroughly characterized in our manuscript, P2C-1F11, P2B-2F6 and P2C-1A3 demonstrated strong neutralizing activity against SARS-CoV-2 pseudovirus with IC<sub>50</sub> of 0.03, 0.05, and 0.62 µg/ml and against live SARS-CoV-2 with IC<sub>50</sub> of 0.03, 0.41, and 0.28 µg/ml, respectively. These values are well in the range of potent human antibodies discovered so far against any human viruses by any standard. In this regard, we do not understand what this reviewer was referring to when saying that “Only 1 of the antibodies they tested neutralizes pseudovirus with IC<sub>50</sub> of 0.1 micrograms”.

Among the many issues, are no negative control staining. Un-impressive Neut activity on the sera from selected individuals including little if any significant cross-neutralization.

**Response:** We don't understand what this reviewer referring to when saying our selected patients were “Un-impressive Neut activity including little if any significant cross-neutralization”. The truth of the matter is our selected patients were meant to cover diverse neutralizing background and represented the real diversity as much as possible. Lack of cross-neutralization against SARS-CoV and MERS-CoV is a fascinating and important finding for the field to better understand complex antibody response in COVID-19 infection.

Hard to imagine how expanded clones of IgG expressing cells are not mutated. Was there a problem in the sorting.

**Response:** Again, we are confused about what the reviewer meant in saying “Hard to imagine how expanded clones of IgG expressing cells are not mutated. Was there a problem in the sorting”? This again highlights reviewer's bias trying to put dogma ahead of real-world scientific discoveries. To this end, we, as the entire scientists in the field, are still learning about what development stage of antibodies would be needed for their neutralizing capacity particularly for COVID-19 patients. In fact, it is not surprising at all to find germline antibodies without any mutations have neutralizing capacity as we have previously shown for germline antibodies against Zika virus identified during acute infection (see below).

1. Wang L, Wang R, Wang L, Ben H, Yu L, Gao F, Shi X, Yin C, Zhang F, Xiang Y, Zhang L. 2019. Structural Basis for Neutralization and Protection by a Zika Virus-Specific Human Antibody. *Cell Rep* 26:3360-3368.e5. doi: 10.1016/j.celrep.2019.02.062.

2. Gao F, Lin X, He L, Wang R, Wang H, Shi X, Zhang F, Yin C, Zhang L, Zhu J, Yu L. 2019. Development of a Potent and Protective Germline-Like Antibody Lineage Against Zika Virus in a Convalescent Human. *Front Immunol* 10:2424.

No structural information to explain how and where the antibodies actually bind. For example, the competition experiments do not show that the antibodies are binding to the receptor binding site, just close to it. And only 2 antibodies really inhibited ACE2 binding to the trimer.

**Response:** The reviewer was correct that we did not have structural information. Now, in the revised manuscript, we provided crystal structure of one of the potent neutralizing antibodies (P2B-2F6) and demonstrated its competition with ACE2 for binding to RBD thereby inhibiting viral entry. However, in our original manuscript, we did provide solid RBD-binding and ACE2 competition experiments, which confirmed our mAbs are indeed RBD-specific and potentially function through competition with ACE2. We not only have “only 2 antibodies really inhibited ACE2 binding to the trimer”, but also have other antibodies inhibited ACE2 binding to RBD in varying degree, highlighting the natural and diverse properties of human antibodies response during COVID-19 infection.

Figure 4B shows pseudo virus data and what we need to see is real IC<sub>50</sub> curves for live virus since the 2 are often quite different and only the latter is important. Figure 4C is impossible to interpret.

**Response:** We agree with the reviewer that our neutralizing assay against live SARS-CoV-2 was hard to interpret. To this end, we have conducted quantitative neutralization assay against live SARS-CoV-2 using focus reduction neutralization test (FRNT) which provides IC<sub>50</sub> values for the testing antibodies;

Referee #2 (Remarks to the Author):

In this manuscript Ju and colleagues report 206 RBD specific mAbs from COVID19 survivors. The data provides an insight into the polyclonal and monoclonal immune response to the SARS-CoV-2 spike and the resulting mAbs might be used as therapeutics. The paper is interesting, of high quality and should be published swiftly. However, there are several points that need the authors' attention.

Major points

1) The font size in Figure 2B and 3A are too small to be readable.

**Response:** As suggested, we have enlarged the font size as much as we could for better clarity.

2) The left and the right pictures of Figure 4C are the same. Duplication?

**Response:** We apologize for uploading the wrong version of the Figure. Given the CPE assay was not terribly quantitative, we have decided to conduct quantitative neutralization assay against live SARS-CoV-2 using focus reduction neutralization test (FRNT) which provides IC<sub>50</sub> values for the testing antibodies. The CPE figures in the original version has therefore been removed in the revised version of our manuscript.

3) The microneutralization titers should be added to Table 1.

**Response:** Yes, we have added microneutralization titers to a new Figure 4E based on more quantitative focus reduction neutralization test (FRNT).

Minor points

1) Throughout the manuscript: ‘spike’, not ‘Spike’

**Response:** We have corrected to “spike”.

2) Throughout the manuscript: Many abbreviations are not defined.

**Response:** We have defined previously undefined abbreviations

3) Throughout the manuscript: It would be better to call SARS-CoV ‘SARS-CoV-1’ since this differentiates better between the old and the new SARS viruses.

**Response:** Although we agree with reviewer’s suggestion, we prefer to keep the nomenclature as they are since SARS-CoV-1 has not been officially recommended by the International Committee on Taxonomy of Viruses (ICTV).

4) Line 161: What does ‘differentially presented’ mean?

**Response:** We meant to say that each antibody clone appeared either once or multiple times due to selection and clonal expansion. As the original sentence is not clear, we decided to remove it in the revised manuscript.

5) Line 265: Should be ‘that cytopathic effect as assay readout’

**Response:** We have replaced CPE assay with much more quantitative FRNT.

6) Line 308: ‘interventions’ and 7) Line 353: ‘transmitted the infection’

**Response:** We corrected these mistake as suggested

8) Line 364: Which antiviral was used?

**Response:** All patients received interferon and ribavirin treatments

9) Line 380: ‘hexahistidine tag’ and 10) Line 385: should be ‘High Five’

**Response:** We corrected as suggested.

11) Line 408: The strep tagged construct is nowhere described.

**Response:** We added description on strep tagged RBD before mentioning its use in B cell isolation.

12) Line 445-446: Please rephrase, and 13) Line 454: ‘HEPE’?

**Response:** We edited these sentence for clarity and changed HEPE to HEPES

14) Line 468: The cells were not digested, they were removed from the plate using trypsin.

**Response:** Agreed and edited appropriately.

15) Line 471: ‘each of the following’ and 16) Line 531: ‘binding or neutralizing’

**Response:** We edited these sentences as suggested by the reviewer.

**Reviewer Reports on the First Revision:**

Referee #1 (Remarks to the Author):

The manuscript describes antibodies from a handful of patients. Only one antibody (1F11) neutralizes infectious virus with IC<sub>50</sub> below 100ng/ml. New to the original submission is the structure of a second antibody to the ACE2 binding site (2F6), which however is not an exceptional neutralizer (400ng/ml). Overall the depth of analysis and the size of the patient cohort is too small to be able to make general conclusions.

Controls are missing. For example in 1A and 1C no positive controls are included for some of the panels, and in 1D no healthy control samples are processed in parallel to determine the level of background staining. In the absence of this information, the values reported in 1E are hard to evaluate. A negative control processed in parallel is even more important since the staining with the RBD probe was performed with only one fluorophore. The existence of high background staining by a single color is demonstrated in figure S2 (P#4C, P#5A, P#22A) and further confirmed by the fact that only 58% of the antibodies that were cloned from the cells sorted by flow were reactive to the antigen.

Figure 1: little information is to be gained from the serologic analysis of these few samples. Plotting the reactivity over time, when the difference between time points is only a few days, is not expected to provide valuable information. Analyses of hundreds of samples is required to make any solid statements with regard to, for example, plasma cross-reactivity (as reported by others).

Figure 2 is descriptive with no major finding. Since antibodies are made of two chains combined (heavy and light) and their combination is important for specificity, there is little purpose in presenting data on unpaired heavy chain. Is this analysis limited to the antibodies with confirmed binding (see concerns about high background above)?

Figure 3 is descriptive but no major finding. Instead, one would want to document the fraction and size of expanded clones with regard to the total number of antibodies, for each of the patients that were analyzed, and this would be included as a panel in one of the other figures or in supplemental (for example as a pie chart diagram).

Table S2: instead of the antibodies summary information (Table S2 and portions of 4E), the full sequence of all of the antibodies (heavy and light chain gene sequences) should be provided as supplementary information so that other investigators are able to recreate the antibodies and reproduce the results.

Figure 5:

Structural information is presented for 2F6, which however is not an exceptional neutralizer (0.4ug/ml).

Additional comments:

- In the abstract "germline divergent antibodies" not clear what the authors mean by this; "impressive binding and neutralizing activity" is misleading since the large majority of the antibodies are >2-3 logs away from the range to be considered impressive.

Referee #2 (Remarks to the Author):

The authors addressed my points well. I think this is a nice study that needs to be reported asap.

Referee #3 (Remarks to the Author):

As requested, my remarks are confined to the structural aspects of this work. That said, I agree that publication of the analysis of the patient sera and antibodies will be of great interest at this time.

The structure reported is of an antibody complex with the RBD of the virus, and that antibody is among the most active in the author's collection. Commentary on the structure is sparse.

The PDB validation report shows that, with respect to backbone and side chain geometry, the structure is 'worse' than most other structures determined at a similar resolution. Whilst these indicators do not challenge the inherent 'correctness' of the structure, they do point to haste in preparing the file for submission. I would not have expected to find geometric outliers within the interface between the antibody and the RBD (see heavy chain Y27, I103, V105, V106 and P107; light chain N33; RBD S494 and F490). The buried surface area on the RBD is on the (not unacceptably) low side expected of an antibody-antigen complex.

If all of the RBD epitope residues derive from the receptor-binding motif (line 296), an explanation is required for the failure of P2B-2F6 to cross-react with SARS CoV RBD (Fig S4). That explanation lies in reference #17 where differences in amino acid sequences between the two spike proteins within their binding sites for the receptor are described. A structural alert to those seeking to find cross-reactive antibodies to SARS-1 and SARS-2 by targeting their ACE2 binding sites is warranted. A vast sequence and structural literature on monoclonal escape mutants of influenza virus is relevant to understanding how even subtle changes to the epitope can seriously compromise antibody binding.

Line 291, not Angstroms squared!

Peter Colman

Referee #4 (Remarks to the Author):

Ju and colleagues report potent human neutralizing antibodies elicited by SARS-CoV-2 infection. The authors report 206 RBD-specific mAbs derived from single B cells of 8 individuals. They found that these mAbs did not cross react with SARS and MERS. Structures revealed competitive binding with ACE2. Potencies ranged but several were in the 30 ng/ml range.

This report is timely, and the scope of analysis is substantial with 206 mAbs. To the best of knowledge of this reviewer, this manuscript is the most comprehensive analysis of mAbs in SARS-CoV-2 infection at the present time. There are interesting findings about the spectrum and specificity of RBD binding, as well as germline sequence changes and structure. As such, I believe this will be informative for Nature readers.

Minor points:

The manuscript would be improved with both positive and negative controls in Fig. 1.

The final sentence of the abstract should be deleted since no prophylactic or therapeutic studies



are reported in this manuscript with these mAbs.

**Author Rebuttals to First Revision:**

**Referee #1 (remarks to the author):** *The manuscript describes antibodies from a handful of patients. Only one antibody (1F11) neutralizes infectious virus with IC50 below 100ng/ml. New to the original submission is the structure of a second antibody to the ACE2 binding site (2F6), which however is not an exceptional neutralizer (400ng/ml). Overall the depth of analysis and the size of the patient cohort is too small to be able to make general conclusions.*

**Response:** Unfortunately, we cannot agree with this assessment. As indicated by our earlier response and with the support of the other three reviewers, the isolated 206 human monoclonal antibodies and their reactivity to SARS-CoV-2, SARS-CoV and MERS-CoV represent the first and the most comprehensive analysis on antibody response in SARS-CoV-2 infection at the present time. In addition, as shown in Fig.3c, the IC50 of 1F11 against live virus is 30ng/ml. We fail to comprehend why this reviewer described it as “below 100ng/ml”, and feel this assessment downplays its potency and thereby, the significance of our study.

The antibody 2F6 crystal structure not only provides the structural basis for antibody competition with ACE2 but also addresses questions on its specificity to RBD raised by this same reviewer, despite relatively less potency compared to 1F11.

*Controls are missing. For example in 1A and 1C no positive controls are included for some of the panels, and in 1D no healthy control samples are processed in parallel to determine the level of background staining. In the absence of this information, the values reported in 1E are hard to evaluate. A negative control processed in parallel is even more important since the staining with the RBD probe was performed with only one fluorophore. The existence of high background staining by a single color is demonstrated in figure S2 (P#4C, P#5A, P#22A) and further confirmed by the fact that only 58% of the antibodies that were cloned from the cells sorted by flow were reactive to the antigen.*

**Response:** We apologized for not including positive control antibodies in the original panel. We have added these controls to Figure 1a, 1b and 1c. We and others previously reported on these antibodies: S230 for SARS-CoV, Mab-GD33 for MERS-CoV, and VRC01 for HIV-1. For RBD-specific B cell sorting, we added background controls in Extended Data Fig. 2 and demonstrated that our isolation procedure is robust and rigorous regardless of whether one or two fluorophores were used. The fact that 58% of cloned antibodies are reactive to the antigen does not have any significant impact on the major conclusions of our manuscript, as the negative clones were discarded and not included in the subsequent analysis.

*Figure 1: Little information is to be gained from the serologic analysis of these few samples. Plotting the reactivity over time, when the difference between time points is only a few days, is not expected to provide valuable information. Analyses of hundreds of samples is required to make any solid statements with regard to, for example, plasma cross-reactivity (as reported by others).*

**Response:** The reviewer must have overlooked this Figure. We did not plot any reactivity over time. The key point of this Figure is to provide critical serological



background for the study subjects, but not to make general conclusions. The absence of cross-reactivity to the RBDs of SARS-CoV and MERS-CoV is novel and certainly worth mentioning in the manuscript.

*Figure 2 is descriptive with no major finding. Since antibodies are made of two chains combined (heavy and light) and their combination is important for specificity, there is little purpose in presenting data on unpaired heavy chain. Is this analysis limited to the antibodies with confirmed binding (see concerns about high background above)?*

**Response:** We agree with the reviewer on this point and have therefore removed this Figure from the manuscript.

*Figure 3 is descriptive but no major finding. Instead, one would want to document the fraction and size of expanded clones with regard to the total number of antibodies, for each of the patients that were analyzed, and this would be included as a panel in one of the other figures or in supplemental (for example as a pie chart diagram).*

**Response:** As suggested, we generated pie chart diagrams to illustrate the fraction and size of expanded clones for the patients studied. We added these charts to the revised Figure 2.

*Table S2: instead of the antibodies summary information (Table S2 and portions of 4E), the full sequence of all of the antibodies (heavy and light chain gene sequences) should be provided as supplementary information so that other investigators are able to recreate the antibodies and reproduce the results.*

**Response:** These data will be shared upon request, as the patent application for these sequences is currently in progress. We will note this in the Data and Code Availability Statement as required by the journal.

*Figure 5: Structural information is presented for 2F6, which however is not an exceptional neutralizer (0.4ug/ml).*

**Response:** We agree with the reviewer and would also much prefer to have the structural information on the top three potent antibodies identified (1F11, 2F6 and 1A3). However, the crystal structure of 2F6 not only provides the structural basis for antibody competition with ACE2 but also addresses the question on its specificity to RBD raised by this same reviewer, despite less potency relative to 1F11.

*Additional comments: In the abstract “germline divergent antibodies” not clear what the authors mean by this; “impressive binding and neutralizing activity” is misleading since the large majority of the antibodies are >2-3 logs away from the range to be considered impressive.*

**Response:** “germline divergent antibodies” refers to antibodies diverging from from the germline sequences. We will clarify in the revised manuscript.

#### **Referee #2 (Remarks to the Author):**

*The authors addressed my points well. I think this is a nice study that needs to be reported asap.*

**Response:** We appreciate both the constructive and positive feedback from this reviewer.

**Referee #3 (Remarks to the Author):**

*As requested, my remarks are confined to the structural aspects of this work. That said, I agree that publication of the analysis of the patient sera and antibodies will be of great interest at this time.*

*The structure reported is of an antibody complex with the RBD of the virus, and that antibody is among the most active in the author's collection. Commentary on the structure is sparse.*

*The PDB validation report shows that, with respect to backbone and side chain geometry, the structure is 'worse' than most other structures determined at a similar resolution. Whilst these indicators do not challenge the inherent 'correctness' of the structure, they do point to haste in preparing the file for submission. I would not have expected to find geometric outliers within the interface between the antibody and the RBD (see heavy chain Y27, I103, V105, V106 and P107; light chain N33; RBD S494 and F490). The buried surface area on the RBD is on the (not unacceptably) low side expected of an antibody-antigen complex.*

**Response:** We thank the reviewer for the careful examination of the structure. The overall statistics of the backbone and side chain geometry are suboptimal in the previous model. We have refined it and the new model shows better performance in the PDB validation report, which is included in the resubmission package. Analysis of the new model shows no changes in the interacting residues at the interface and that the buried surface area on the RBD is 626 Å. As the validation server user guide explains, residues that are outliers on one or more model-validation criteria could either be errors in the model or reflect genuine structural features. Careful analysis of the experimental data (electron density maps) is typically required to make this distinction. We checked the map at the interface, and the interacting residues (including heavy chain Y27, I103, V105, V106 and P107; light chain N33; RBD S494 and F490) fit well into the map (Please see #Figure 1 below). We have provided the refined coordinate and mtz files for the reviewer to check the electron density map.

Regarding to the relatively small buried surface area at the interface, we believe that it is caused by the overall binding mode of the antibody P2B-2F6 to the RBD, in which the 2F6 binds to the "edge" instead of the "flat surface" of the RBM for ACE2 binding. However, binding with the "edge" still results in steric hindrance that would prevent efficient ACE2 engagement, as we show in Figure 4 of the revised manuscript.

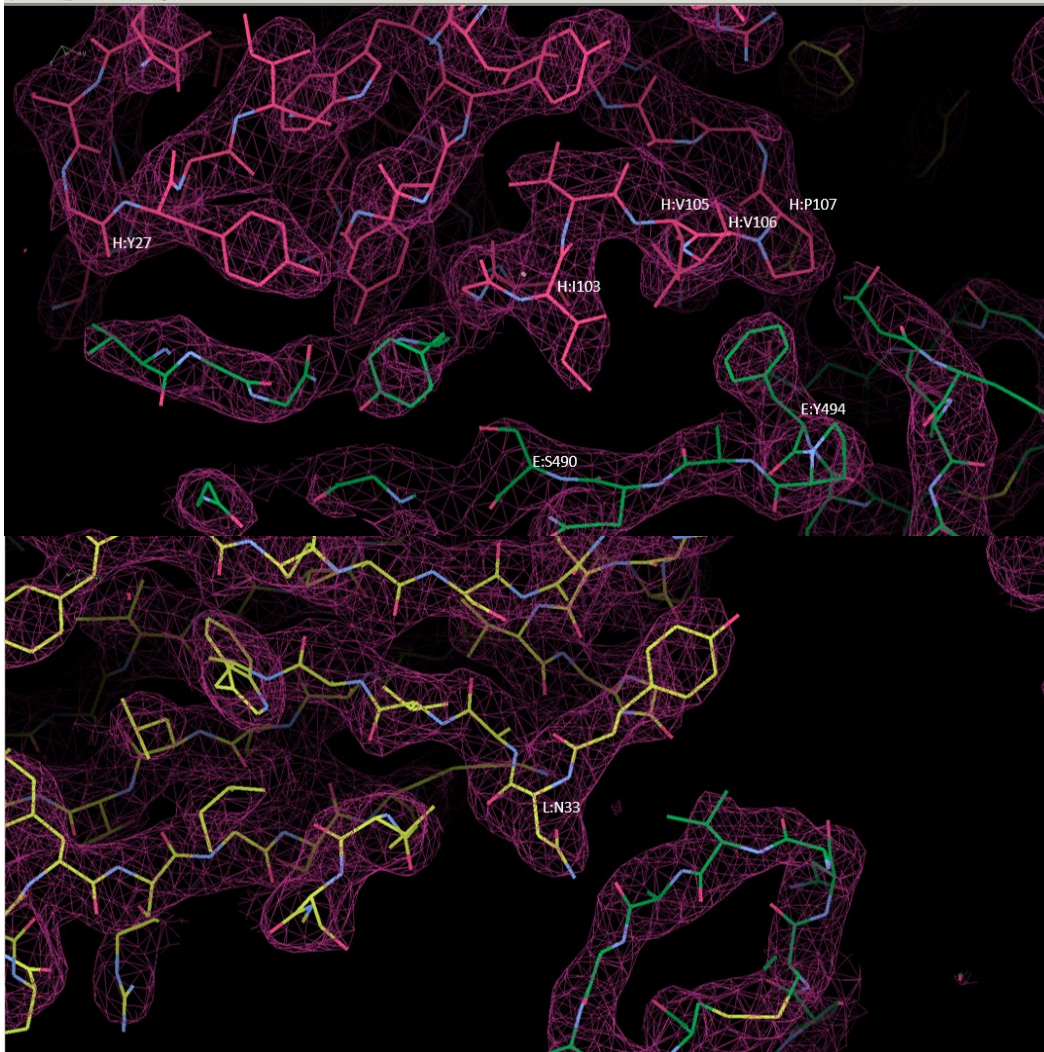

**#Figure 1.** 2Fo-Fc electron density maps contoured at  $1.2\sigma$  at the interface.

*If all of the RBD epitope residues derive from the receptor-binding motif (line 296), an explanation is required for the failure of P2B-2F6 to cross-react with SARS CoV RBD (Fig S4). That explanation lies in reference #17 where differences in amino acid sequences between the two spike proteins within their binding sites for the receptor are described. A structural alert to those seeking to find cross-reactive antibodies to SARS-1 and SARS-2 by targeting their ACE2 binding sites is warranted. A vast sequence and structural literature on monoclonal escape mutants of influenza virus is relevant to understanding how even subtle changes to the epitope can seriously compromise antibody binding.*

**Response:** We thank the reviewer for this good suggestion. In the #Figure 2, we aligned the sequences of the SARS-CoV-2 and SARS-CoV RBD and found that, among the twelve epitope residues recognized by P2B-2F6, only four are conserved while the other eight are different between SARS-CoV-2 and SARS-CoV. Such high levels of distinction likely explain the absence of cross-reactivity to SARS-CoV by P2B-2F6. We've added this explanation in the Discussion section of the revised manuscript.

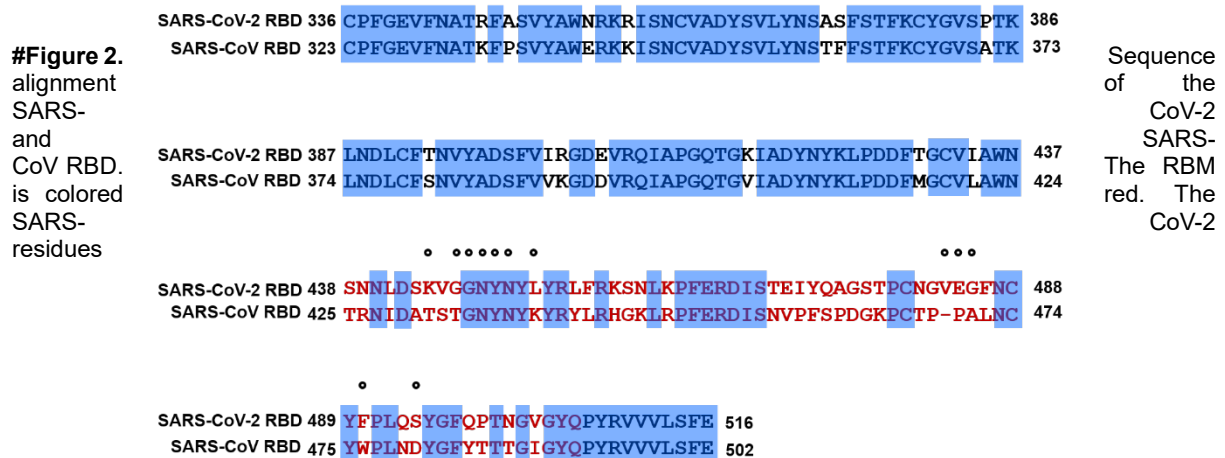

recognized by P2B-2F6 are indicated by circles.

*Line 291, not Angstroms squared!*

**Response:** We apologized for the typo. It has been corrected in the revised manuscript.

#### **Referee #4 (Remarks to the Author):**

*Ju and colleagues report potent human neutralizing antibodies elicited by SARS-CoV-2 infection. The authors report 206 RBD-specific mAbs derived from single B cells of 8 individuals. They found that these mAbs did not cross react with SARS and MERS. Structures revealed competitive binding with ACE2. Potencies ranged but several were in the 30 ng/ml range.*

*This report is timely, and the scope of analysis is substantial with 206 mAbs. To the best of knowledge of this reviewer, this manuscript is the most comprehensive analysis of mAbs in SARS-CoV-2 infection at the present time. There are interesting findings about the spectrum and specificity of RBD binding, as well as germline sequence changes and structure. As such, I believe this will be informative for Nature readers.*

**Response:** We appreciate the reviewer in recognizing our timely and important findings on a substantial number of mAbs from SARS-CoV-2 patients.

*Minor points: The manuscript would be improved with both positive and negative controls in Fig. 1.*

**Response:** As suggested, we have added appropriate controls to Figure 1 and Extended Data Fig. 2.

*The final sentence of the abstract should be deleted since no prophylactic or therapeutic studies are reported in this manuscript with these mAbs.*

**Response:** As suggested, we have removed the sentences from the abstract.
